# Supplementary material for: Smoke-free law compliance and predictive factors in Ethiopia: observational assessment of public places and workplaces
Source: HighWire-hosted journal article supplement (doi:10.1136/tc-2022-057750), 2023-03-01
Supplement: tc-2022-057750supp001_data_supplement.pdf [file tc-2022-057750supp001_data_supplement.pdf]

Supplementary materials

### Appendix 1: Assessment Checklists

|                            |                                                                                                                                                                                                                     |
|----------------------------|---------------------------------------------------------------------------------------------------------------------------------------------------------------------------------------------------------------------|
| <b>note</b>                | Greetings!                                                                                                                                                                                                          |
| <b>select_one YN</b>       | Are you volunteer to participate in this study?                                                                                                                                                                     |
| <b>select_one Q1</b>       | Q1 Region?                                                                                                                                                                                                          |
| <b>text</b>                | Q2. Town Name                                                                                                                                                                                                       |
| <b>text</b>                | Q3. Name of institution                                                                                                                                                                                             |
| <b>text</b>                | Q4. Type of Business or Service                                                                                                                                                                                     |
| <b>text</b>                | Q5. the Name of the person who gives the interview                                                                                                                                                                  |
| <b>select_one Q6</b>       | Q6. What is your role or position within the organization?                                                                                                                                                          |
| <b>select_one YN</b>       | Q7. Existence of DSA (N.B- A space labeled as DSA)-Observation                                                                                                                                                      |
| <b>select_one YN</b>       | Q8. Are there people smoking a cigarette in any indoors or within ten meters radius outdoor of the establishment? (10-meter radius from window, door, or open gate of the indoor, other than the DSA)-Observation   |
| <b>select_one YN</b>       | Q9. Availability of No smoking signage or Stickers-observation                                                                                                                                                      |
| <b>select_one YN</b>       | Q10. Are No smoking signages or Stickers placed appropriately and visibly? (At the gate, where people used to work or sit to entertain)-observation                                                                 |
| <b>select_one YN</b>       | Q11. Is the language used in the No smoking signage or sticker clear or understandable to the customer or employee?                                                                                                 |
| <b>select_one YN</b>       | Q12. Presence of an ashtray or lighter or other devices in any indoor section or within ten meters radius outdoor of the establishment? (10 meter radius from window, door, or open gate of the indoor)-observation |
| <b>select_one YN</b>       | Q13. The presence of tobacco remains such as cigarette butt within the smoking prohibited section of the establishment-observation                                                                                  |
| <b>select_one YN</b>       | Q14. Presence of tobacco smell within the smoking prohibited section of the establishment-observation                                                                                                               |
| <b>select_one YN</b>       | Q15. Presence of a person actually smoking tobacco within the smoking prohibited section of the establishment-observation                                                                                           |
| <b>select_one YN</b>       | Q16. Presence of written regulation by the establishment to ban or prohibit smoking-observation                                                                                                                     |
| <b>select_one YN</b>       | Q17. Mechanism set by the establishment to enforce smoke free provision (e.g measures to take when it found someone start smoking)                                                                                  |
| <b>select_one YN</b>       | Q18. Do you know about tobacco smoke free law?                                                                                                                                                                      |
| <b>select_multiple Q19</b> | Q19. Where do you get the information about smoke free law                                                                                                                                                          |
| <b>text</b>                | Q20. What do you think about the implementation of SFE? Probe: Contribution of staff                                                                                                                                |
| <b>select_one YN</b>       | Q21. Is there any challenge you faced to implement Smoke free law?                                                                                                                                                  |

|               |                                                                                                |
|---------------|------------------------------------------------------------------------------------------------|
| text          | Q22. If Q21 is yeas, what mechanisms you have used to cope up with the challenges?             |
| select_one YN | Q23. Is there a mechanism to regularly check that everyone respects the rule?                  |
| text          | Q24. What do you do to stop a person who is found smoking?                                     |
| text          | Q25. What were the reasons behind for those who violated in spite of the existence of signage? |
| select_one YN | Q26. Do you think your establishment is implementing 100% smoke free law?                      |
| text          | Q27. If Q 26 is yes, how do you achieve this result?                                           |
| text          | Please write a comment                                                                         |

## Appendix 2: CONSENT FORM (English version)

Greetings!

My name is \_\_\_\_\_. My colleagues and I are both from the Ethiopian Food and Drug Authority (EFDA).

Introduction: This informed consent form is for respondents who can provide adequate information about smoke-free environment implementation. This establishment was selected as a part of the smoke-free initiative in this study. Before you decide to participate, it is important to understand why the research is being conducted and what it will involve. Please take time to read the following information carefully and do not hesitate to ask our staff if there is anything that is unclear or if you would like more information. Please take the time to decide whether you wish to participate.

Purpose: This research aims to understand the implementation of smoke-free laws in public places.

Type of research intervention: This research will involve collecting relevant information about smoke-free status in various public places, such as government buildings, schools, healthcare facilities, transport facilities, and hospitality settings.

Participant selection: All public places in the selected town were part of the study, and participants were preferably adults and those who knew the smoke-free environment implementation well, including owners, managers, and employers.

**Voluntary participation:** Your participation in this study is voluntary. It is your choice of whether to participate. You may change your mind later and stop participating even if you agree.

**Risks:** This study poses a minimum risk. The visits will take a small amount of time, but we will try to keep the observational assessment as short as possible and observe all the indoors and premises of the building.

**Benefits:** All participants will indirectly benefit from the data collected, as this will help us better understand the smoke-free law implementation status in Ethiopia. As tobacco kills secondhand smokers, the findings of this study will help directly nonsmokers from involuntary smoking exposure, because a 100% smoke-free environment is the only measure to prohibit smoking in any public place.

**Confidentiality:** The information that we collect during this study will be kept confidential. Information collected from you and your institution will be stored away, and only the researchers will be able to see it. In addition, only identifiers will be used during the data analysis, an aggregated form of data will be used, and no single type of data will be reported. The data will not be shared with or given to anyone except for the EFDA and regional regulatory offices.

**Who to contact?** If you have any questions, you may ask our staff about them now or later. If you wish to ask questions later, you may contact the research coordinators.

### **Annex 3: Field Checklist**

- I. Inform the appropriate government body such as town administration or health office in the selected town using the official support letters about the data collection and get support letter from them if needed.
- II. Get familiar with the city and determine the institution's real location in consultation with your field guide to design the route plan for smooth data collection
- III. Choose an appropriate time for data collection based on the nature of the workplace and hospitality settings (based on each type of institution's regular working hours).
- IV. Contact the appropriate person of the institution such as managers, directors, or owners, introduce yourself using official letters and a personal badge, and get informed consent using the printout consent form

- V. Determine the institution venue Including all areas within the compound and indoor area of the institution particularly, a toilet area near a dining area and the dining area, lobby area, a stairwell, bedrooms, offices, a waiting area, or common area, classrooms, wards, offices that were open to the public, corridors, and other indoor areas for your assessment.
- VI. Draw a standard itinerary to address all prohibited areas within the selected establishment and select the starting point purposely and follow a continuous path.
- VII. In hospitality venues' data collection, please enter the venue, sit as customers, visit the toilet area, and observed the other areas available in the venue.
- VIII. Record all information based on the study checklist using your tablet.
- IX. In each study location, please record the number of people smoking, the presence or absence of cigarette butts, cigarette sales, ashtrays, a label of DSA, the smell of tobacco within the prohibited area, and no-smoking signs, and the visibility of any no-smoking signs – compare with EFDA-approved signage using your show cards.
- X. Take pictures of a cigarette butt, lighter/ashtray, and no smoking signage/stickers within the prohibited area if possible, during the interviews.
- XI. Send your data regularly and keep your records securely
- XII. Contact your supervisors and coordinators and share your plan
